# Supplementary material for: The novel quinoline derivative SKA-346 as a KCa3.1 channel selective activator
Source: Royal Society of Chemistry journal article supplement (doi:10.1039/d4ra07330d), 2024-01-01
Supplement: d4ra07330d2.pdf [file d4ra07330d2.pdf]

**Supplementary Table 1.** Pharmacokinetic parameters of SKA-346 in BALB/c mice blood plasma samples following 24 h post *i.p.* single dose administration

| Parameters         | Units         | Estimate    |
|--------------------|---------------|-------------|
| N_Samples          |               | 7           |
| Dose               | mg            | 30          |
| Rsq                |               | 0.9990666   |
| Rsq_adjusted       |               | 0.99813321  |
| Corr_XY            |               | -0.99953319 |
| No_points_lambda_z |               | 3           |
| Lambda_z           | 1/h           | 0.24422251  |
| Lambda_z_intercept |               | 9.3659546   |
| Lambda_z_lower     | h             | 4           |
| Lambda_z_upper     | h             | 24          |
| HL_Lambda_z (t1/2) | h             | 2.838179    |
| Span               |               | 7.046772    |
| Tlag               | h             | 0           |
| Tmax               | h             | 0.25        |
| Cmax               | ng/ml         | 6295.4      |
| Cmax_D             | kg*ng/ml/mg   | 209.8466    |
| Tlast              | h             | 24          |
| Clast              | ng/ml         | 32.7        |
| Clast_pred         | ng/ml         | 33.268614   |
| AUClast            | h*ng/ml       | 45487.063   |
| AUClast_D          | h*kg*ng/ml/mg | 1516.2354   |
| AUCall             | h*ng/ml       | 45487.063   |
| AUCINF_obs         | h*ng/ml       | 45620.957   |
| AUCINF_D_obs       | h*kg*ng/ml/mg | 1520.6986   |
| AUC_%Extrap_obs    | %             | 0.29349295  |
| Vz_F_obs           | ml/kg         | 2692.5959   |
| Cl_F_obs           | ml/h/kg       | 657.59252   |
| AUCINF_pred        | h*ng/ml       | 45623.285   |
| AUCINF_D_pred      | h*kg*ng/ml/mg | 1520.7762   |
| AUC_%Extrap_pred   | %             | 0.29858121  |
| Vz_F_pred          | ml/kg         | 2692.4585   |
| Cl_F_pred          | ml/h/kg       | 657.55896   |
| AUMClast           | h*h*ng/ml     | 219263.62   |
| AUMCINF_obs        | h*h*ng/ml     | 223025.33   |
| AUMC_%Extrap_obs   | %             | 1.686674    |
| AUMCINF_pred       | h*h*ng/ml     | 223090.74   |
| AUMC_%Extrap_pred  | %             | 1.7155001   |
| MRTlast            | h             | 4.8203513   |
| MRTINF_obs         | h             | 4.8886596   |
| MRTINF_pred        | h             | 4.8898439   |
